# Supplementary material for: Willingness to Pay for a Contributory Social Health Insurance Scheme: A Survey of Rural Residents in Akwa Ibom State, Nigeria
Source: Front Public Health. 2021 Jun 17;9:654362. doi: 10.3389/fpubh.2021.654362 (PMC8247944; doi:10.3389/fpubh.2021.654362)
Supplement: Supplementary file 1 [file Table_1.XLSX]

## Sheet: Data
WTP	Have you heard of HI	Income of Breadwinner	Income of Spouse	How do you pay for Rx	Av Amt paid for H	Effect on feeding	Fre of borrowing	Perceived Health	Size of Household	Age of Head	Gender of Head	Educational status	Religion
0	NO	30500	30500	self	3000	Mild	Rarely	Good	5	85	Male	Primary education	Pentecostal
5000	NO	10000	10000	N/A	N/A	None	Never	Excellent	11	60	Female	Primary education	Pentecostal
0	NO	30500	30500	self	N/A	Mild	Rarely	Very good	4	33	Male	Senior Secondary	Pentecostal
5000	YES	10000	10000	self	1000	Mild	Rarely	Very good	5	40	Male	Primary education	Others
15000	NO	10000	10000	self	1000	Mild	Rarely	Very good	2	33	Male	Senior Secondary	Pentecostal
5000	NO	30500	10000	self	3000	Mild	Rarely	Very good	4	52	Male	Senior Secondary	Pentecostal
5000	NO	30500	10000	self	1000	Mild	Rarely	Very good	12	50	Male	Primary education	Pentecostal
5000	NO	10000	10000	self	1000	Mild	Rarely	Very good	2	33	Male	Senior Secondary	Pentecostal
10000	YES	30500	30500	self	3000	Mild	Rarely	Very good	2	60	Female	Senior Secondary	Others
10000	YES	30500	10000	self	1000	Mild	Rarely	Very good	6	45	Male	HND/Graduate	Pentecostal
2000	NO	10000	10000	self	3000	Moderate	Often	Good	4	33	Female	Primary education	Catholic
25000	NO	10000	10000	self	3000	Moderate	Often	Good	8	43	Male	No Schooling	Pentecostal
2000	NO	10000	10000	self	7500	Moderate	Rarely	Fair	2	48	Female	Primary education	Anglican
10000	NO	10000	10000	self	3000	Severe	Often	Very good	4	35	Male	Senior Secondary	Catholic
0	NO	10000	10000	self	1000	Mild	Rarely	Very good	3	50	Male	Primary education	Catholic
20000	NO	10000	10000	self	3000	Moderate	Rarely	Very good	4	50	Male	Primary education	Pentecostal
5000	NO	30500	50500	self	3000	Mild	Rarely	Very good	3	35	Male	Diploma/NCE	Pentecostal
7000	YES	50500	10000	self	3000	Mild	Rarely	Excellent	2	25	Male	HND/Graduate	Pentecostal
5000	YES	30500	30500	self	3000	Mild	Rarely	Very good	4	70	Male	Senior Secondary	Anglican
6000	NO	30500	30500	self	3000	Moderate	Rarely	Good	3	20	Female	Primary education	Pentecostal
5000	YES	30500	10000	self	3000	Mild	Rarely	Good	2	51	Male	Junior Secondary	Anglican
5000	NO	10000	10000	self	1000	Mild	Rarely	Very good	5	40	Male	Senior Secondary	Anglican
20000	NO	10000	10000	self	1000	Mild	Rarely	Very good	5	30	Male	Primary education	Anglican
6000	NO	10000	30500	self	3000	Mild	Rarely	Good	5	35	Female	Senior Secondary	Pentecostal
8000	NO	10000	10000	self	3000	Moderate	Rarely	Fair	2	35	Female	Primary education	Pentecostal
5000	NO	10000	10000	self	3000	Mild	Rarely	Very good	2	75	Male	Primary education	Anglican
5000	NO	30500	30500	self	3000	Mild	Rarely	Very good	5	45	Male	Primary education	Anglican
6000	NO	10000	10000	self	1000	Moderate	Rarely	Fair	2	30	Male	Junior Secondary	Pentecostal
1000	NO	10000	10000	self	1000	N/A	Often	Fair	7	55	Female	No Schooling	Anglican
0	NO	10000	10000	self	1000	Mild	Rarely	Very good	4	56	Male	Primary education	Pentecostal
0	NO	10000	10000	self	1000	Severe	Rarely	Good	8	35	Female	Senior Secondary	Catholic
0	NO	10000	10000	self	1000	Severe	Rarely	Fair	6	55	Male	Primary education	Pentecostal
0	NO	30500	10000	N/A	N/A	None	Never	Good	1	31	Female	Senior Secondary	Anglican
0	NO	10000	10000	self	1000	N/A	Rarely	Fair	10	78	Male	Primary education	Pentecostal
0	NO	30500	10000	N/A	N/A	None	Never	Very good	6	53	Male	Senior Secondary	Pentecostal
1000	NO	10000	10000	self	3000	Severe	Rarely	Good	3	33	Male	Senior Secondary	Pentecostal
5000	NO	30500	10000	self	3000	Severe	Rarely	Good	7	60	Female	Senior Secondary	Pentecostal
10000	YES	50500	30500	self	3000	Moderate	Rarely	Good	4	34	Male	Senior Secondary	Pentecostal
0	NO	50500	10000	self	1000	Severe	Rarely	Good	3	45	Male	Senior Secondary	Pentecostal
12000	YES	10000	30500	self	3000	Severe	Rarely	Good	10	61	Male	Senior Secondary	Pentecostal
12000	YES	30500	10000	self	1000	Severe	Rarely	Very good	4	42	Female	Post-graduate	Pentecostal
10000	NO	10000	10000	Other	3000	N/A	Sometimes	Good	1	38	Male	Senior Secondary	Pentecostal
5000	NO	10000	10000	self	15000	5	Rarely	Excellent	1	23	Male	HND/Graduate	Pentecostal
0	NO	30500	10000	Other	15000	5	Rarely	Excellent	5	27	Male	Senior Secondary	Anglican
0	YES	30500	30500	self	15000	Mild	Rarely	Excellent	7	60	Male	Senior Secondary	Pentecostal
0	NO	10000	10000	self	3000	Severe	Often	Good	5	57	Female	Primary education	Anglican
50000	YES	50500	10000	self	1000	Mild	Rarely	Very good	4	30	Male	HND/Graduate	Anglican
10000	NO	30500	10000	self	3000	Moderate	Rarely	Very good	4	38	Male	Senior Secondary	Anglican
12000	YES	30500	10000	self	7500	N/A	Often	Good	5	38	Male	Senior Secondary	Anglican
3000	NO	10000	10000	self	3000	Severe	Rarely	Good	3	76	Female	Primary education	Catholic
5000	NO	30500	10000	self	7500	N/A	Rarely	Very good	9	45	Male	Senior Secondary	Catholic
8000	NO	50500	10000	self	3000	Moderate	Rarely	Good	4	65	Male	Primary education	Anglican
0	NO	10000	10000	self	15000	5	Rarely	Very good	5	37	Male	Junior Secondary	Pentecostal
5000	NO	30500	10000	self	1000	Mild	Rarely	Good	5	30	Male	Diploma/NCE	Anglican
0	NO	90500	30500	self	1000	Mild	Rarely	Very good	8	57	Male	Senior Secondary	Anglican
1000	YES	50500	30500	self	3000	Moderate	Often	Very good	4	35	Male	Senior Secondary	Pentecostal
5000	YES	30500	10000	self	3000	Moderate	Often	Very good	4	31	Male	Senior Secondary	Pentecostal
5000	NO	70500	30500	self	3000	Moderate	Often	Excellent	4	44	Female	Senior Secondary	Pentecostal
10000	NO	10000	10000	self	1000	Mild	Often	Very good	2	30	Male	Senior Secondary	Pentecostal
10000	YES	50500	10000	self	1000	Mild	Rarely	Very good	7	35	Male	HND/Graduate	Catholic
6000	NO	30500	10000	self	1000	Mild	Rarely	Excellent	2	51	Male	Senior Secondary	Pentecostal
5500	NO	30500	10000	self	1000	Mild	Rarely	Excellent	6	40	Male	Senior Secondary	Pentecostal
10000	NO	30500	10000	self	1000	Mild	Rarely	Excellent	5	45	Male	Senior Secondary	Pentecostal
5000	NO	10000	10000	self	1000	Moderate	Sometimes	Very good	12	51	Female	Senior Secondary	Pentecostal
5000	NO	70500	10000	self	1000	Mild	Rarely	Very good	6	43	Male	Senior Secondary	Pentecostal
0	NO	50500	10000	self	1000	Mild	Rarely	Excellent	5	32	Male	Senior Secondary	Pentecostal
12000	NO	30500	30500	self	7500	Moderate	Rarely	Very good	7	40	Male	Post-graduate	Catholic
20000	NO	10000	10000	N/A	N/A	None	Never	Excellent	2	28	Male	Senior Secondary	Pentecostal
0	NO	30500	10000	self	1000	Mild	Rarely	Very good	6	35	Male	Senior Secondary	Pentecostal
24000	NO	30500	30500	self	1000	Mild	Rarely	Excellent	2	45	Male	Senior Secondary	Pentecostal
10000	NO	30500	10000	self	1000	Mild	Rarely	Excellent	5	31	Male	Primary education	Pentecostal
10000	NO	30500	10000	self	3000	Mild	Rarely	Excellent	5	43	Male	Primary education	Pentecostal
0	NO	50500	50500	self	1000	Mild	Rarely	Very good	1	27	Female	Senior Secondary	Pentecostal
0	NO	10000	10000	self	1000	Mild	Rarely	Excellent	5	30	Male	No Schooling	Pentecostal
0	NO	10000	10000	self	1000	Mild	Rarely	Excellent	3	35	Male	Senior Secondary	Others
3000	NO	30500	10000	self	1000	Mild	Rarely	Good	2	60	Male	Senior Secondary	Others
10000	NO	30500	10000	self	1000	Mild	Rarely	Very good	3	3	Male	Senior Secondary	Others
20000	NO	10000	10000	self	1000	Mild	Rarely	Very good	8	74	Male	Primary education	Pentecostal
3000	NO	10000	10000	self	1000	Mild	Rarely	Very good	6	50	Male	Senior Secondary	Others
2000	NO	10000	10000	self	1000	Mild	Rarely	Very good	5	45	Male	Senior Secondary	Others
4000	NO	10000	10000	self	3000	Mild	Rarely	Good	6	60	Female	Primary education	Others
5000	NO	10000	10000	self	1000	Mild	Rarely	Very good	4	45	Male	Senior Secondary	Pentecostal
10000	NO	30500	10000	self	3000	Mild	Rarely	Very good	3	32	Male	Senior Secondary	Pentecostal
1000	NO	30500	10000	self	1000	Mild	Rarely	Very good	3	53	Male	Primary education	Catholic
1500	NO	30500	10000	N/A	N/A	None	Never	Good	5	63	Female	No Schooling	Anglican
10000	NO	10000	10000	self	3000	Moderate	Often	Good	3	62	Female	Primary education	Anglican
10000	NO	50500	10000	self	3000	Mild	Rarely	Very good	7	30	Male	Senior Secondary	Anglican
15000	NO	30500	10000	self	3000	Mild	Rarely	Very good	5	45	Male	Primary education	Anglican
4000	NO	10000	10000	Other	1000	Moderate	Rarely	Very good	2	75	Male	Primary education	Pentecostal
5000	NO	10000	10000	self	3000	Moderate	Often	Fair	2	68	Female	Primary education	Pentecostal
7000	NO	10000	10000	self	3000	Severe	Rarely	Very good	5	45	Female	Primary education	Pentecostal
3000	NO	30500	10000	self	1000	Mild	Rarely	Excellent	7	51	Male	Senior Secondary	Pentecostal
0	NO	10000	10000	self	1000	Mild	Rarely	Excellent	2	51	Female	Primary education	Others
10000	NO	30500	10000	self	1000	Mild	Rarely	Very good	7	90	Male	Primary education	Others
5000	NO	10000	10000	self	1000	Mild	Rarely	Very good	3	43	Male	Diploma/NCE	Pentecostal
2000	NO	50500	10000	self	1000	Mild	Rarely	Very good	4	33	Male	HND/Graduate	Others
5000	NO	30500	30500	self	3000	Mild	Rarely	Good	2	62	Female	Senior Secondary	Others
5000	NO	30500	10000	self	1000	Mild	Rarely	Very good	5	39	Male	Senior Secondary	Others
3000	NO	10000	10000	self	1000	Mild	Rarely	Very good	3	40	Male	Senior Secondary	Pentecostal
5000	NO	30500	10000	self	1000	Mild	Rarely	Very good	5	40	Male	Senior Secondary	Others
10000	NO	10000	10000	self	1000	Mild	Rarely	Very good	5	50	Female	Senior Secondary	Others
10000	NO	30500	10000	self	3000	Mild	Rarely	Very good	6	50	Male	Junior Secondary	Pentecostal
10000	NO	10000	10000	self	1000	Mild	Rarely	Very good	2	30	Male	Junior Secondary	Others
5000	NO	10000	10000	self	1000	Mild	Rarely	Good	4	60	Male	Primary education	Others
3000	NO	10000	10000	self	3000	Moderate	Often	Good	6	65	Female	Primary education	Others
10000	NO	30500	10000	self	1000	Mild	Rarely	Very good	5	42	Male	Senior Secondary	Pentecostal
15000	NO	10000	10000	self	7500	N/A	5	Fair	4	58	Female	Primary education	Catholic
12000	NO	10000	10000	self	3000	Moderate	Often	Good	5	40	Male	Senior Secondary	Others
0	YES	10000	10000	self	7500	N/A	Alwaays	Good	5	60	Male	Post-graduate	Others
0	YES	50500	30500	self	3000	Mild	Rarely	Very good	6	56	Male	HND/Graduate	Others
10000	YES	90500	50500	self	12500	Mild	Rarely	Very good	6	54	Male	Diploma/NCE	Others
15000	YES	30500	10000	self	3000	Mild	Rarely	Very good	7	45	Male	Senior Secondary	Anglican
4000	NO	30500	30500	self	3000	Mild	Rarely	Very good	5	56	Male	Junior Secondary	Anglican
10000	NO	10000	10000	self	3000	Moderate	Rarely	Excellent	3	25	Male	HND/Graduate	Others
21000	YES	30500	30500	self	7500	Severe	Alwaays	Very good	5	53	Male	Primary education	Catholic
5000	YES	30500	10000	self	3000	Moderate	Often	Very good	7	75	Female	Junior Secondary	Anglican
10000	NO	30500	10000	self	3000	Moderate	Rarely	Very good	4	20	Female	No Schooling	Anglican
5000	NO	10000	10000	self	1000	Mild	Rarely	Good	3	19	Female	Senior Secondary	Anglican
20000	NO	30500	10000	self	1000	Moderate	Rarely	Very good	3	19	Female	Senior Secondary	Anglican
15000	YES	30500	10000	self	1000	Mild	Rarely	Very good	5	34	Male	Primary education	Catholic
18000	NO	30500	30500	self	3000	Moderate	Rarely	Excellent	8	50	Female	Senior Secondary	Pentecostal
10000	NO	30500	30500	self	3000	Mild	Rarely	Excellent	2	56	Female	Senior Secondary	Pentecostal
22000	YES	30500	30500	self	3000	Mild	Rarely	Very good	4	37	Male	Senior Secondary	Catholic
8000	NO	10000	10000	self	3000	Moderate	Rarely	Very good	6	70	Female	Primary education	Pentecostal
3000	NO	10000	10000	self	3000	Moderate	Rarely	Good	3	33	Male	Senior Secondary	Pentecostal
0	NO	30500	10000	Other	15000	5	Rarely	Very good	5	56	Male	Primary education	Catholic
40000	YES	30500	30500	self	3000	Severe	Rarely	Fair	6	47	Male	Diploma/NCE	Pentecostal
30000	NO	10000	10000	self	7500	Severe	Sometimes	Good	7	49	Male	Junior Secondary	Anglican
15000	YES	10000	10000	self	3000	Moderate	Rarely	Very good	4	43	Male	Senior Secondary	Anglican
10000	NO	10000	10000	self	1000	Mild	Rarely	Excellent	4	35	Male	Senior Secondary	Pentecostal
8000	NO	10000	10000	self	1000	Mild	Rarely	Good	3	48	Female	Primary education	Pentecostal
15000	YES	10000	10000	N/A	N/A	None	Never	Very good	5	33	Male	Senior Secondary	Pentecostal
0	NO	10000	10000	self	3000	N/A	Rarely	Fair	7	51	Male	Vocational education	Catholic
10000	NO	30500	10000	self	3000	Mild	Rarely	Very good	1	35	Male	Junior Secondary	Pentecostal
0	NO	10000	10000	self	1000	Severe	Rarely	Excellent	5	36	Female	Primary education	Pentecostal
0	NO	30500	10000	Other	15000	5	Rarely	Very good	1	36	Female	No Schooling	Pentecostal
0	YES	10000	10000	self	1000	Moderate	Rarely	Fair	4	25	Male	Senior Secondary	Catholic
0	NO	10000	10000	self	1000	Severe	Rarely	Fair	8	36	Female	Primary education	Pentecostal
15000	NO	70500	30500	self	12500	Mild	Rarely	Very good	2	64	Male	Senior Secondary	Pentecostal
1000	YES	10000	10000	Other	3000	Severe	Alwaays	Good	1	26	Male	HND/Graduate	Pentecostal
30000	YES	130000	30500	self	3000	Mild	Rarely	Good	9	54	Male	Diploma/NCE	Pentecostal
12000	YES	30500	10000	self	12500	N/A	Sometimes	Fair	5	70	Male	No Schooling	Anglican
0	NO	50500	50500	self	12500	N/A	Rarely	Very good	9	50	Male	Senior Secondary	Pentecostal
3000	NO	10000	10000	self	3000	N/A	Sometimes	Good	6	45	Male	Primary education	Pentecostal
0	YES	50500	30500	self	7500	N/A	Rarely	Very good	4	49	Male	Senior Secondary	Pentecostal
7500	NO	10000	10000	self	1000	Severe	Rarely	Good	6	55	Male	Senior Secondary	Anglican
5000	NO	30500	30500	self	3000	N/A	Often	Fair	9	53	Female	Senior Secondary	Pentecostal
20000	NO	50500	10000	self	3000	N/A	Sometimes	Good	6	45	Male	Senior Secondary	Pentecostal
20000	NO	50500	10000	N/A	N/A	None	Never	Good	7	45	Male	Junior Secondary	Pentecostal
10000	NO	30500	10000	self	3000	Severe	Rarely	Very good	1	31	Female	Diploma/NCE	Anglican
6000	NO	10000	30500	self	3000	Severe	Rarely	Good	1	27	Female	Senior Secondary	Catholic
0	YES	50500	30500	N/A	N/A	None	Never	Very good	5	35	Male	HND/Graduate	Pentecostal
7500	NO	10000	10000	self	3000	Moderate	Often	Good	5	42	Female	Primary education	Catholic
10000	YES	50500	10000	self	1000	Mild	Often	Very good	4	33	Female	HND/Graduate	Catholic
20000	YES	30500	10000	self	12500	Severe	Rarely	Good	4	53	Male	Diploma/NCE	Pentecostal
20000	NO	90500	30500	self	3000	Mild	Rarely	Excellent	7	55	Male	HND/Graduate	Pentecostal
10000	NO	30500	10000	self	3000	Mild	Rarely	Very good	3	34	Male	Junior Secondary	Pentecostal
3000	YES	10000	10000	self	1000	Moderate	Rarely	Fair	6	40	Male	Junior Secondary	Pentecostal
50000	NO	30500	10000	self	1000	Mild	Rarely	Very good	1	36	Female	Diploma/NCE	Catholic
5000	NO	30500	10000	self	3000	Moderate	Often	Very good	6	48	Male	Primary education	Catholic
15000	NO	30500	10000	self	1000	Mild	Rarely	Good	4	73	Male	Primary education	Anglican
7500	NO	10000	10000	self	3000	Moderate	Rarely	Good	2	52	Female	Primary education	Anglican
15000	NO	10000	10000	self	1000	Mild	Rarely	Very good	2	57	Female	Primary education	Pentecostal
2500	NO	10000	10000	self	1000	Severe	Rarely	Good	9	63	Male	Primary education	Pentecostal
16000	NO	10000	10000	self	3000	Moderate	Rarely	Good	9	56	Male	Junior Secondary	Pentecostal
20000	YES	10000	10000	self	3000	Moderate	Rarely	Good	8	57	Female	No Schooling	Others
12000	NO	50500	30500	self	3000	Mild	Rarely	Excellent	4	49	Male	HND/Graduate	Pentecostal
8000	YES	10000	10000	self	7500	Moderate	Alwaays	Good	3	40	Male	Senior Secondary	Others
0	NO	10000	10000	self	7500	Moderate	Rarely	Good	5	50	Female	Primary education	Others
0	NO	10000	10000	self	12500	N/A	5	Very good	8	58	Female	HND/Graduate	Pentecostal
22000	YES	50500	30500	self	3000	Mild	Rarely	Very good	8	50	Male	Primary education	Catholic
35000	YES	50500	30500	self	1000	Mild	Rarely	Very good	6	52	Male	Senior Secondary	Catholic
25000	NO	30500	50500	self	1000	Mild	Rarely	Very good	9	53	Male	Primary education	Others
20000	NO	30500	30500	self	3000	Moderate	Often	Very good	5	50	Male	Senior Secondary	Pentecostal
75000	NO	10000	10000	self	15000	5	Rarely	Very good	6	37	Male	Senior Secondary	Pentecostal
15000	YES	10000	10000	Other	7500	Moderate	Alwaays	Fair	9	84	Male	Primary education	Pentecostal
20000	YES	30500	30500	self	3000	Moderate	Often	Good	5	60	Female	Senior Secondary	Others
10000	NO	30500	10000	self	1000	Mild	Rarely	Very good	4	65	Male	Senior Secondary	Pentecostal
7500	NO	10000	10000	self	1000	Mild	Rarely	Good	6	30	Female	Senior Secondary	Others
5000	NO	10000	10000	self	1000	Mild	Rarely	Very good	3	35	Female	No Schooling	Others
7500	NO	30500	10000	self	1000	Mild	Rarely	Very good	8	29	Female	Senior Secondary	Anglican
0	NO	10000	10000	self	3000	Mild	Rarely	Good	2	55	Female	Primary education	Pentecostal
50000	YES	50500	30500	self	3000	Moderate	Rarely	Very good	4	61	Male	Primary education	Anglican
0	NO	10000	10000	N/A	N/A	None	Never	Very good	5	70	Male	Primary education	Anglican
12000	NO	50500	10000	self	7500	N/A	Rarely	Good	7	65	Female	Senior Secondary	Pentecostal
5000	YES	30500	30500	self	7500	N/A	Rarely	Good	8	25	Male	Senior Secondary	Pentecostal
22000	NO	30500	10000	self	3000	N/A	Rarely	Good	8	42	Male	Primary education	Pentecostal
20000	YES	30500	10000	Insurance	15000	5	Rarely	Very good	6	49	Male	Primary education	Anglican
10000	NO	10000	10000	self	3000	Severe	Rarely	Good	6	47	Male	Senior Secondary	Anglican
10000	YES	50500	10000	self	3000	Mild	Rarely	Fair	6	68	Male	HND/Graduate	Pentecostal
12000	NO	30500	10000	self	3000	Mild	Rarely	Excellent	6	67	Male	HND/Graduate	Pentecostal
5000	NO	10000	10000	self	3000	Mild	Rarely	Fair	2	85	Male	Primary education	Anglican
12000	YES	30500	30500	self	3000	Mild	Rarely	Excellent	2	66	Male	HND/Graduate	Pentecostal
25000	NO	50500	10000	self	3000	Mild	Rarely	Very good	5	49	Male	Junior Secondary	Anglican
36000	YES	30500	50500	self	7500	Severe	Rarely	Fair	9	70	Male	HND/Graduate	Catholic
20000	YES	30500	10000	self	3000	Moderate	Rarely	Good	6	39	Male	Diploma/NCE	Anglican
5000	NO	30500	10000	self	3000	Mild	Rarely	Very good	1	30	Female	Diploma/NCE	Pentecostal
10000	NO	70500	10000	self	3000	Mild	Rarely	Very good	1	43	Male	Senior Secondary	Pentecostal
5000	NO	30500	10000	self	1000	Mild	Rarely	Good	3	42	Female	Primary education	Pentecostal
0	YES	10000	10000	self	3000	Severe	Often	Fair	1	35	Male	HND/Graduate	Pentecostal
12000	YES	30500	10000	self	12500	N/A	Alwaays	Fair	4	81	Male	Senior Secondary	Anglican
20000	NO	30500	10000	self	3000	Mild	Rarely	Excellent	4	48	Male	Senior Secondary	Pentecostal
30000	YES	30500	50500	Insurance	15000	5	Rarely	Very good	3	31	Male	Senior Secondary	Anglican
0	NO	50500	130000	self	7500	Mild	Rarely	Fair	3	36	Male	Senior Secondary	Pentecostal
6000	NO	30500	30500	self	7500	Severe	Rarely	Very good	8	32	Female	Senior Secondary	Anglican
0	YES	30500	10000	self	3000	5	Rarely	Very good	1	32	Male	HND/Graduate	Pentecostal
10000	YES	50500	10000	N/A	N/A	None	Never	Very good	1	27	Female	Senior Secondary	Pentecostal
22000	YES	50500	30500	self	3000	Mild	Rarely	Very good	4	27	Female	Senior Secondary	Pentecostal
0	YES	30500	10000	self	1000	Mild	Rarely	Excellent	5	35	Male	HND/Graduate	Pentecostal
15000	YES	90500	10000	self	7500	Severe	Rarely	Very good	3	35	Male	HND/Graduate	Anglican
0	YES	50500	10000	self	1000	Mild	Rarely	Very good	5	62	Male	Senior Secondary	Anglican
6000	NO	30500	10000	self	1000	Mild	Rarely	Excellent	1	27	Male	Senior Secondary	Pentecostal
5000	YES	10000	10000	self	1000	Severe	Rarely	Excellent	3	20	Male	Vocational education	Catholic
20000	YES	50500	30500	Insurance	7500	Mild	Rarely	Good	2	24	Female	HND/Graduate	Pentecostal
2500	NO	30500	10000	self	1000	Mild	Rarely	Excellent	4	30	Male	Senior Secondary	Others
10000	NO	30500	30500	self	1000	Moderate	Rarely	Good	10	60	Female	Senior Secondary	Pentecostal
25000	NO	10000	10000	self	15000	Mild	Rarely	Fair	8	39	Female	Junior Secondary	Pentecostal
20000	YES	50500	10000	N/A	N/A	None	Never	Very good	8	61	Male	Senior Secondary	Catholic
10000	YES	10000	10000	self	1000	Mild	Rarely	Very good	6	71	Male	Primary education	Anglican
5000	NO	10000	10000	self	1000	Mild	Rarely	Very good	1	47	Male	Primary education	Anglican
1000	NO	10000	10000	self	3000	Mild	Rarely	Fair	2	65	Male	Primary education	Anglican
1000	NO	10000	10000	self	3000	Moderate	Often	Fair	2	80	Male	Primary education	Anglican
20000	NO	30500	10000	N/A	N/A	None	Never	Excellent	9	52	Male	Senior Secondary	Pentecostal
6000	NO	10000	10000	self	1000	Mild	Rarely	Good	5	45	Female	Primary education	Pentecostal
20000	NO	30500	10000	self	3000	Moderate	Rarely	Very good	5	41	Male	Junior Secondary	Pentecostal
25000	NO	50500	10000	self	15000	Severe	Often	Very good	10	63	Male	Primary education	Others
40000	NO	30500	10000	self	3000	Moderate	Rarely	Very good	6	40	Male	Post-graduate	Others
11000	NO	30500	30500	self	7500	Moderate	Alwaays	Very good	5	42	Male	Senior Secondary	Others
20000	YES	50500	50500	self	3000	Mild	Rarely	Good	12	52	Female	Primary education	Pentecostal
15000	YES	30500	10000	self	1000	Mild	Rarely	Very good	8	49	Male	Junior Secondary	Anglican
20000	YES	30500	10000	self	7500	Severe	Alwaays	Good	7	50	Male	Primary education	Others
12000	YES	30500	30500	NGO	7500	N/A	Often	Good	5	60	Male	Junior Secondary	Others
12000	NO	10000	10000	self	7500	Severe	Often	Good	5	37	Female	Primary education	Pentecostal
20000	NO	10000	10000	self	1000	Mild	Often	Very good	3	23	Male	Senior Secondary	Pentecostal
35000	NO	30500	30500	N/A	N/A	None	Never	Very good	9	50	Male	Diploma/NCE	Anglican
40000	YES	30500	30500	self	3000	Mild	Rarely	Good	7	60	Male	Vocational education	Catholic
5000	NO	10000	30500	N/A	N/A	None	Never	Very good	5	20	Female	Senior Secondary	Anglican
30000	NO	30500	30500	self	3000	Mild	Often	Very good	5	48	Female	Junior Secondary	Catholic
0	NO	30500	30500	self	1000	Mild	Rarely	Excellent	2	35	Male	Senior Secondary	Pentecostal
13000	NO	50500	10000	self	3000	Moderate	Often	Good	5	52	Male	Primary education	Catholic
15000	YES	30500	10000	self	3000	Moderate	Rarely	Very good	1	30	Female	Senior Secondary	Pentecostal
3000	YES	50500	30500	self	7500	Moderate	Rarely	Very good	4	35	Male	Senior Secondary	Pentecostal
0	YES	30500	10000	self	3000	Mild	Rarely	Very good	6	50	Male	Primary education	Anglican
5000	NO	10000	10000	self	3000	Mild	Rarely	Very good	2	78	Male	Primary education	Anglican
15000	NO	30500	30500	self	3000	Severe	Rarely	Good	7	50	Male	Senior Secondary	Others
10000	NO	70500	30500	self	7500	Mild	Rarely	Fair	2	70	Male	Post-graduate	Pentecostal
0	NO	10000	10000	self	3000	Severe	Rarely	Very good	5	45	Female	Primary education	Anglican
0	NO	10000	10000	self	1000	Mild	Rarely	Very good	3	65	Female	Primary education	Anglican
25000	NO	10000	10000	self	3000	Mild	Rarely	Good	5	33	Male	Senior Secondary	Pentecostal
0	NO	10000	10000	self	1000	N/A	Rarely	Fair	4	24	Female	Senior Secondary	Catholic
10000	NO	10000	10000	Other	15000	5	Rarely	Very good	2	63	Male	Primary education	Pentecostal
25000	YES	50500	10000	self	3000	Moderate	Rarely	Good	5	45	Male	Senior Secondary	Pentecostal
40000	NO	50500	30500	self	7500	Moderate	Often	Very good	5	30	Male	HND/Graduate	Pentecostal
12000	NO	10000	10000	self	1000	Moderate	Rarely	Good	20	54	Male	Primary education	Anglican
0	NO	10000	10000	self	1000	N/A	Often	Fair	8	61	Female	No Schooling	Pentecostal
50000	YES	90500	50500	N/A	N/A	None	Never	Very good	9	54	Male	Senior Secondary	Anglican
0	NO	50500	30500	self	7500	Severe	Rarely	Very good	6	49	Male	Junior Secondary	Anglican
25000	YES	50500	30500	self	12500	N/A	Rarely	Good	5	40	Male	HND/Graduate	Anglican
24000	YES	30500	50500	self	7500	N/A	Rarely	Good	7	37	Female	HND/Graduate	Anglican
0	NO	30500	10000	self	7500	N/A	Alwaays	Good	6	56	Male	Senior Secondary	Anglican
25000	YES	30500	30500	self	15000	Mild	Rarely	Good	6	56	Female	Senior Secondary	Pentecostal
12000	NO	10000	30500	self	3000	Moderate	Rarely	Good	7	40	Male	Senior Secondary	Catholic
0	YES	70500	10000	self	3000	Mild	Rarely	Very good	2	31	Male	HND/Graduate	Pentecostal
12000	NO	10000	10000	self	15000	Severe	Rarely	Good	4	39	Male	Senior Secondary	Pentecostal
30000	NO	30500	30500	self	3000	Moderate	Rarely	Very good	5	28	Male	Senior Secondary	Pentecostal
25000	YES	30500	50500	self	1000	Mild	Rarely	Very good	7	42	Male	Diploma/NCE	Anglican
25000	YES	50500	30500	self	3000	Mild	Rarely	Very good	8	51	Male	HND/Graduate	Pentecostal
55000	YES	130000	10000	self	7500	Mild	Rarely	Good	6	45	Male	Post-graduate	Pentecostal
30000	YES	70500	50500	self	3000	Mild	Often	Excellent	5	36	Female	Post-graduate	Pentecostal
10000	NO	30500	30500	self	3000	Moderate	Rarely	Very good	6	24	Female	Senior Secondary	Others
0	NO	30500	30500	self	1000	Mild	Rarely	Excellent	2	45	Female	Primary education	Pentecostal
12000	NO	50500	50500	N/A	N/A	None	Never	Excellent	7	55	Male	Diploma/NCE	Pentecostal
15000	YES	30500	10000	self	3000	Moderate	Rarely	Very good	3	36	Female	Senior Secondary	Catholic
25000	NO	10000	10000	self	1000	Mild	Rarely	Excellent	5	39	Male	Senior Secondary	Pentecostal
25000	NO	30500	10000	self	3000	Moderate	Often	Very good	8	49	Male	Junior Secondary	Pentecostal
130000	NO	50500	10000	self	3000	Moderate	Often	Good	6	50	Male	Senior Secondary	Others
14000	NO	30500	30500	self	7500	Severe	Rarely	Good	5	57	Male	Primary education	Pentecostal
15000	YES	30500	10000	self	3000	Moderate	Often	Good	7	60	Male	Senior Secondary	Catholic
12500	NO	50500	30500	self	3000	Mild	Rarely	Very good	9	40	Female	Primary education	Pentecostal
0	YES	30500	70500	self	7500	Mild	Often	Good	4	73	Male	Senior Secondary	Catholic
25000	NO	90500	30500	self	7500	Severe	Often	Good	6	60	Male	HND/Graduate	Pentecostal
15000	YES	30500	10000	self	3000	Mild	Rarely	Very good	8	56	Female	Senior Secondary	Pentecostal
15000	YES	30500	10000	self	3000	Moderate	Rarely	Very good	5	54	Male	Senior Secondary	Pentecostal
15000	YES	30500	10000	self	3000	Moderate	Rarely	Very good	4	45	Male	Junior Secondary	Pentecostal
15000	YES	30500	30500	self	3000	Mild	Rarely	Very good	8	55	Male	Senior Secondary	Catholic
12500	NO	30500	10000	self	3000	Mild	Rarely	Very good	8	51	Male	Senior Secondary	Catholic
				0.818182
							228	0.797203
